# Supplementary material for: Impact of a Community-Based Education Program on Maternal and Child Health Needs in a Semi-Urban Locality: A University-Community Partnership Pilot Project
Source: Research Square preprint supplement (doi:10.21203/rs.3.rs-6589019/v1), 2025-06-03
Supplement: Supplementary file 1 [file d082830754e839d81b57f0e4.pdf]

## Supplementary File

### Survey Questionnaire

**Population:** Women of reproductive age (15-49) having at least one under 5 years of age child

**Respondent's Code:** \_\_\_\_\_

**Address:** \_\_\_\_\_

**Surveyor's name** \_\_\_\_\_

**Coding Category**

**Date** \_\_\_\_\_  
**Start Time** \_\_\_\_\_ **Hours** \_\_\_\_\_ **Mins** \_\_\_\_\_

**9- Refused**

**99- Not Applicable**

**999- I don't Know**

| Section 1: Qualifying Questions              |                                                                                                |                                                                                                                                                                      |
|----------------------------------------------|------------------------------------------------------------------------------------------------|----------------------------------------------------------------------------------------------------------------------------------------------------------------------|
| 1.                                           | Age of Respondent (Years)<br>جواب دہندہ کی عمر (سال)                                           | (15-24) ..... 1<br>(25-34) ..... 2<br>(35 & above) ..... 3                                                                                                           |
| 2.                                           | Marital Status<br>ازدواجی حیثیت                                                                | Married..... 1<br>Widow ..... 2<br>Divorcee..... 3                                                                                                                   |
| 3.                                           | Do you have any children less than 5 years of age?<br>کیا آپ کے 5 سال سے کم عمر بچے ہیں؟       | No ..... 0<br>Yes ..... 1                                                                                                                                            |
| Section 2: Physical Examination              |                                                                                                |                                                                                                                                                                      |
| 4.                                           | Height of respondent<br>جواب دہندہ کا قد                                                       | _____ cm                                                                                                                                                             |
| 5.                                           | Weight of respondent<br>جواب دہندہ کا وزن                                                      | _____ kg                                                                                                                                                             |
| 6.                                           | Wrist circumference of respondent<br>جواب دہندہ کی کلائی کا گھیرا                              | _____ cm                                                                                                                                                             |
| 7.                                           | Physical Examination for Anemia of respondent<br>جواب دہندہ کی خون کی کمی کے لیے جسمانی معائنہ |                                                                                                                                                                      |
| Section 3: Socio-demographic characteristics |                                                                                                |                                                                                                                                                                      |
| 8.                                           | How many family members are living in this household?<br>اس گھر میں کتنے افراد رہتے ہیں؟       | a. Number of female ____<br>خواتین کی تعداد<br>b. Number of male ____<br>مردوں کی تعداد<br>c. Number of children under five ____<br>پانچ سال سے کم عمر بچوں کی تعداد |

| 9.                                                   | What is your family system?<br>آپ کا خاندانی نظام کیا ہے؟                                                                                               | Joint /Extended.....0<br>Nuclear.....1                                                                                                                                                                                                                                                                                                                                                                                                                                  |         |  |                                                      |  |                                                   |  |                                                      |  |                     |  |                     |  |                    |  |
|------------------------------------------------------|---------------------------------------------------------------------------------------------------------------------------------------------------------|-------------------------------------------------------------------------------------------------------------------------------------------------------------------------------------------------------------------------------------------------------------------------------------------------------------------------------------------------------------------------------------------------------------------------------------------------------------------------|---------|--|------------------------------------------------------|--|---------------------------------------------------|--|------------------------------------------------------|--|---------------------|--|---------------------|--|--------------------|--|
| 10.                                                  | Respondent's Education<br>جواب دہندہ کی تعلیم                                                                                                           | No formal schooling.....0<br>Primary (1-5 years) .....1<br>Middle (8 years) .....2<br>Secondary (9-12 years) .....3<br>Graduation ( more than 12 years ) .....4                                                                                                                                                                                                                                                                                                         |         |  |                                                      |  |                                                   |  |                                                      |  |                     |  |                     |  |                    |  |
| 11.                                                  | Respondent's employment status<br>جواب دہندہ کی ملازمت کی حیثیت                                                                                         | No .....0<br>Yes .....1                                                                                                                                                                                                                                                                                                                                                                                                                                                 |         |  |                                                      |  |                                                   |  |                                                      |  |                     |  |                     |  |                    |  |
| 12.                                                  | Respondent's occupation<br>جواب دہندہ کا پیشہ                                                                                                           | Unskilled .....1<br>Skilled .....2<br>Managerial .....3<br>Professional.....4<br>Any other, mention ( ) 5                                                                                                                                                                                                                                                                                                                                                               |         |  |                                                      |  |                                                   |  |                                                      |  |                     |  |                     |  |                    |  |
| 13.                                                  | Husband's Education:<br>خاوند کی تعلیم                                                                                                                  | No formal schooling .....0<br>Primary (1-5 years) .....1<br>Middle (8 years) .....2<br>Secondary (9-12 years) .....3<br>Graduation ( more than 12 years ) .....4                                                                                                                                                                                                                                                                                                        |         |  |                                                      |  |                                                   |  |                                                      |  |                     |  |                     |  |                    |  |
| 14.                                                  | Husband's employment status<br>خاوند کی ملازمت کی حیثیت                                                                                                 | No .....0<br>Yes .....1                                                                                                                                                                                                                                                                                                                                                                                                                                                 |         |  |                                                      |  |                                                   |  |                                                      |  |                     |  |                     |  |                    |  |
| 15.                                                  | Husband Occupation<br>خاوند کا پیشہ                                                                                                                     | Unskilled .....1<br>Skilled .....2<br>Managerial .....3<br>Professional.....4<br>Any other, mention ( ) 5                                                                                                                                                                                                                                                                                                                                                               |         |  |                                                      |  |                                                   |  |                                                      |  |                     |  |                     |  |                    |  |
| 16.                                                  | Monthly family income<br>گھر کی ماہانہ آمدنی                                                                                                            | < Rs. 20000 .....1<br>= Rs, 20001 -50000 .....2<br>> Rs, 50001 .....3                                                                                                                                                                                                                                                                                                                                                                                                   |         |  |                                                      |  |                                                   |  |                                                      |  |                     |  |                     |  |                    |  |
| 17.                                                  | Does this household own any livestock, herds, other farm animals, or poultry?<br>کیا یہ گھرانہ کسی مویشی، ریوڑ، دوسرے فارمی جانور یا پولٹری کا مالک ہے؟ | No .....0<br>Yes .....1                                                                                                                                                                                                                                                                                                                                                                                                                                                 |         |  |                                                      |  |                                                   |  |                                                      |  |                     |  |                     |  |                    |  |
| <b>If no, go to Q 19</b>                             |                                                                                                                                                         |                                                                                                                                                                                                                                                                                                                                                                                                                                                                         |         |  |                                                      |  |                                                   |  |                                                      |  |                     |  |                     |  |                    |  |
| 18.                                                  | How many of the following any animals do this household have?<br>اس گھرانے میں درج ذیل میں سے کتنے جانور ہیں؟<br>(تعداد لکھیں)                          | <table border="1"> <tr> <th colspan="2">Animals</th></tr> <tr> <td>a) Milk cows or bulls?<br/>دودھ دینے والی گائے یا بیل</td><td></td></tr> <tr> <td>b) Other cattle (buffalo)?<br/>دوسرے مویشی (بھینس)</td><td></td></tr> <tr> <td>c) Horses, donkeys and mules?<br/>گھوڑے، گدھے اور خچر</td><td></td></tr> <tr> <td>d) Goats?<br/>بکریاں</td><td></td></tr> <tr> <td>e) Sheep?<br/>بھیڑیں</td><td></td></tr> <tr> <td>f) Camels?<br/>اونٹ</td><td></td></tr> </table> | Animals |  | a) Milk cows or bulls?<br>دودھ دینے والی گائے یا بیل |  | b) Other cattle (buffalo)?<br>دوسرے مویشی (بھینس) |  | c) Horses, donkeys and mules?<br>گھوڑے، گدھے اور خچر |  | d) Goats?<br>بکریاں |  | e) Sheep?<br>بھیڑیں |  | f) Camels?<br>اونٹ |  |
| Animals                                              |                                                                                                                                                         |                                                                                                                                                                                                                                                                                                                                                                                                                                                                         |         |  |                                                      |  |                                                   |  |                                                      |  |                     |  |                     |  |                    |  |
| a) Milk cows or bulls?<br>دودھ دینے والی گائے یا بیل |                                                                                                                                                         |                                                                                                                                                                                                                                                                                                                                                                                                                                                                         |         |  |                                                      |  |                                                   |  |                                                      |  |                     |  |                     |  |                    |  |
| b) Other cattle (buffalo)?<br>دوسرے مویشی (بھینس)    |                                                                                                                                                         |                                                                                                                                                                                                                                                                                                                                                                                                                                                                         |         |  |                                                      |  |                                                   |  |                                                      |  |                     |  |                     |  |                    |  |
| c) Horses, donkeys and mules?<br>گھوڑے، گدھے اور خچر |                                                                                                                                                         |                                                                                                                                                                                                                                                                                                                                                                                                                                                                         |         |  |                                                      |  |                                                   |  |                                                      |  |                     |  |                     |  |                    |  |
| d) Goats?<br>بکریاں                                  |                                                                                                                                                         |                                                                                                                                                                                                                                                                                                                                                                                                                                                                         |         |  |                                                      |  |                                                   |  |                                                      |  |                     |  |                     |  |                    |  |
| e) Sheep?<br>بھیڑیں                                  |                                                                                                                                                         |                                                                                                                                                                                                                                                                                                                                                                                                                                                                         |         |  |                                                      |  |                                                   |  |                                                      |  |                     |  |                     |  |                    |  |
| f) Camels?<br>اونٹ                                   |                                                                                                                                                         |                                                                                                                                                                                                                                                                                                                                                                                                                                                                         |         |  |                                                      |  |                                                   |  |                                                      |  |                     |  |                     |  |                    |  |

|                                                     |                                                                                                                                               |                                                                                                                                                                                                                                                                                                                           |                            |
|-----------------------------------------------------|-----------------------------------------------------------------------------------------------------------------------------------------------|---------------------------------------------------------------------------------------------------------------------------------------------------------------------------------------------------------------------------------------------------------------------------------------------------------------------------|----------------------------|
|                                                     |                                                                                                                                               | g) Chickens or other poultry?<br>مرغیاں یا دیگر پولٹری                                                                                                                                                                                                                                                                    |                            |
| <b>Section 3: Sanitation and Hygiene</b>            |                                                                                                                                               |                                                                                                                                                                                                                                                                                                                           |                            |
| 19.                                                 | How many times do you wash your hands in a day?<br>آپ ایک دن میں کتنی مرتبہ ہاتھ دھوتے ہیں؟                                                   | 1-2 times .....1<br>3-4 times.....2<br>5 and more times.....3                                                                                                                                                                                                                                                             |                            |
| 20.                                                 | Do you wash your hands<br>کیا آپ اپنے ہاتھ دھوتے ہیں؟                                                                                         |                                                                                                                                                                                                                                                                                                                           | <b>No (0)      Yes (1)</b> |
|                                                     | a) before eating every meal?<br>ہر کھانا کھانے سے پہلے؟                                                                                       |                                                                                                                                                                                                                                                                                                                           |                            |
|                                                     | b) before feeding a child?<br>بچے کو کھانا کھلانے سے پہلے؟                                                                                    |                                                                                                                                                                                                                                                                                                                           |                            |
|                                                     | c) before preparing food?<br>کھانا تیار کرنے سے پہلے؟                                                                                         |                                                                                                                                                                                                                                                                                                                           |                            |
|                                                     | d) after handling diapers of baby?<br>بچے کے لنگوٹ کو سنبھالنے کے بعد؟                                                                        |                                                                                                                                                                                                                                                                                                                           |                            |
|                                                     | e) with soap after using latrine?<br>لیٹرین استعمال کرنے کے بعد صابن کے ساتھ؟                                                                 |                                                                                                                                                                                                                                                                                                                           |                            |
| 21.                                                 | How many washrooms are in your home?<br>آپ کے گھر میں کتنے واش روم ہیں؟                                                                       | One .....1<br>Two .....2<br>Three or more .....3                                                                                                                                                                                                                                                                          |                            |
| 22.                                                 | From where do you get drinking water?<br>آپ پینے کا پانی کہاں سے حاصل کرتے ہیں؟                                                               | a) Tap water .....0<br>b) Filter .....1                                                                                                                                                                                                                                                                                   |                            |
| 23.                                                 | Do you boil water before drinking?<br>کیا آپ پینے سے پہلے پانی ابالتے ہیں؟                                                                    | No .....0<br>Yes .....1                                                                                                                                                                                                                                                                                                   |                            |
| 24.                                                 | Where do you store your drinking water?<br>آپ اپنے پینے کا پانی کہاں ذخیرہ کرتے ہیں؟                                                          | Open container.....1<br>Closed container.....2                                                                                                                                                                                                                                                                            |                            |
| <b>Section 4: Healthcare Access and Information</b> |                                                                                                                                               |                                                                                                                                                                                                                                                                                                                           |                            |
| 25.                                                 | If you suffer from illness in your family from where you get treatment?<br>اگر آپ کبھی کسی بیماری کا شکار ہوتے ہیں تو کہاں سے علاج کراتے ہیں؟ | <b>Place of Treatment</b><br>a) Self-medication<br>ڈاکٹر کے مشورے کے بغیر دوائی لینا<br>b) Private clinic/Trust<br>پرائیویٹ کلینک/ٹرسٹ<br>c) Government hospital<br>سرکاری ہسپتال<br>d) Homeopathic<br>ہومیوپیتھک<br>e) Traditional healer<br>روایتی شفا دینے والا/حکیم<br>f) Pharmacy<br>فارمیسی<br>g) Other<br>کوئی اور | <b>No (0)      Yes (1)</b> |
| 26.                                                 | If your child suffer from illness in your family from where you get treatment?                                                                | a) Self-medication<br>ڈاکٹر کے مشورے کے بغیر دوائی لینا<br>b) Private clinic/Trust<br>پرائیویٹ کلینک/ٹرسٹ<br>c) Government hospital<br>سرکاری ہسپتال                                                                                                                                                                      |                            |

|                                  |                                                                                                            |                                                                                                     |               |                |
|----------------------------------|------------------------------------------------------------------------------------------------------------|-----------------------------------------------------------------------------------------------------|---------------|----------------|
|                                  |                                                                                                            | d) Homeopathic<br>ہومیوپیتھک                                                                        |               |                |
|                                  |                                                                                                            | e) Traditional healer<br>روایتی شفا دینے والا/حکیم                                                  |               |                |
|                                  |                                                                                                            | f) Pharmacy<br>فارمیسی                                                                              |               |                |
|                                  |                                                                                                            | g) Other<br>کوئی اور                                                                                |               |                |
| 27.                              | From where do you get Health related Information?<br>آپ صحت سے متعلق معلومات کہاں سے حاصل کرتے ہیں؟        | <b>Media Sources</b>                                                                                | <b>No (0)</b> | <b>Yes (1)</b> |
|                                  |                                                                                                            | a) Television<br>ٹیلیوژن                                                                            |               |                |
|                                  |                                                                                                            | b) WhatsApp<br>واٹس ایپ                                                                             |               |                |
|                                  |                                                                                                            | c) Social Media (Facebook, Twitter, Instagram etc.)<br>سوشل میڈیا (فیس بک، ٹویٹر، انسٹا گرام وغیرہ) |               |                |
|                                  |                                                                                                            | d) Health Facility/ Health care worker<br>صحت کی سہولت/ صحت کی دیکھ بھال کرنے والا کارکن            |               |                |
|                                  |                                                                                                            | e) Family members/ Friends<br>خاندان کے افراد/دوست                                                  |               |                |
|                                  |                                                                                                            | f) Community health workers/ Community leader<br>کمیونٹی ہیلتھ ورکرز/کمیونٹی لیڈر                   |               |                |
|                                  |                                                                                                            | g) Social Mobilizers<br>سماجی متحرک                                                                 |               |                |
|                                  |                                                                                                            | h) Religious leaders<br>مذہبی رہنما                                                                 |               |                |
|                                  |                                                                                                            | i) Other _____<br>کوئی اور                                                                          |               |                |
| <b>Section 5: Antenatal care</b> |                                                                                                            |                                                                                                     |               |                |
| 28.                              | Age at the time of marriage<br>شادی کے وقت کی عمر                                                          | <input type="text"/> <input type="text"/>                                                           |               |                |
| 29.                              | Total number of pregnancies<br>حمل کی کل تعداد                                                             | <input type="text"/> <input type="text"/>                                                           |               |                |
| 30.                              | Age when first child was born<br>پہلے بچے کی پیدائش کے وقت آپ کی عمر                                       | <input type="text"/> <input type="text"/>                                                           |               |                |
| 31.                              | Number of alive children<br>زندہ بچوں کی تعداد                                                             | <input type="text"/> <input type="text"/>                                                           |               |                |
| 32.                              | Number of under 5 years children<br>پانچ سال سے کم عمر بچوں کی تعداد                                       | <input type="text"/> <input type="text"/>                                                           |               |                |
| 33.                              | Current status of pregnancy<br>حمل کی موجودہ حالت                                                          | Currently not pregnant.....0<br>Currently pregnant.....1                                            |               |                |
| 34.                              | Current status of lactation<br>دودھ پلانے کی موجودہ حالت                                                   | Currently not lactation.....0<br>Currently lactating .....1                                         |               |                |
| 35.                              | Have you experienced any complication during your last pregnancy?<br>کیا آپ نے اپنے پچھلے حمل کے دوران کسی | No .....0<br>Yes.....1                                                                              |               |                |

|                         |                                                                                                                                                                                                                                                 |                                                                                                                                                                                                          |               |                |
|-------------------------|-------------------------------------------------------------------------------------------------------------------------------------------------------------------------------------------------------------------------------------------------|----------------------------------------------------------------------------------------------------------------------------------------------------------------------------------------------------------|---------------|----------------|
|                         | پیدائش کا تجربہ کیا ہے؟                                                                                                                                                                                                                         |                                                                                                                                                                                                          |               |                |
| <b>If no, go to Q37</b> |                                                                                                                                                                                                                                                 |                                                                                                                                                                                                          |               |                |
| 36.                     | If yes then<br>اگر ہاں                                                                                                                                                                                                                          | <b>Complications</b>                                                                                                                                                                                     | <b>No (0)</b> | <b>Yes (1)</b> |
|                         |                                                                                                                                                                                                                                                 | a) Gestational diabetes mellitus                                                                                                                                                                         |               |                |
|                         |                                                                                                                                                                                                                                                 | b) Hypertension                                                                                                                                                                                          |               |                |
|                         |                                                                                                                                                                                                                                                 | c) Edema                                                                                                                                                                                                 |               |                |
|                         |                                                                                                                                                                                                                                                 | d) Others,                                                                                                                                                                                               |               |                |
| 37.                     | Did you consult anyone for antenatal care during your last pregnancy?<br>کیا آپ نے اپنے آخری حمل کے دوران قبل از پیدائش کی دیکھ بھال کے لیے کسی سے رجوع کیا                                                                                     | No .....0<br>Yes.....1                                                                                                                                                                                   |               |                |
| <b>If No, go to Q43</b> |                                                                                                                                                                                                                                                 |                                                                                                                                                                                                          |               |                |
| 38.                     | Whom did you consult?<br>آپ نے کس کو دیکھا؟                                                                                                                                                                                                     | Health professional Doctor.....1<br>Nurse/midwife.....2<br>Lady health visitor.....3<br>Community mid wife.....4<br>traditional birth attendant.....5<br>Lady health worker.....6<br>Other(mention)..... |               |                |
| 39.                     | When did you first receive antenatal care during your last pregnancy?<br>آپ نے اپنے آخری حمل کے دوران پہلی بار قبل از پیدائش کی دیکھ بھال کب حاصل کی؟                                                                                           | _____ months<br>_____ weeks                                                                                                                                                                              |               |                |
| 40.                     | How many times did you receive antenatal care during your last pregnancy?<br>آپ نے اپنے آخری حمل کے دوران کتنی بار قبل از پیدائش کی دیکھ بھال حاصل کی؟                                                                                          |                                                                                                                                                                                                          |               |                |
| 41.                     | As part of your antenatal care during your last pregnancy, were any of the following done at least once:<br>آپ کے آخری حمل کے دوران آپ کی قبل از پیدائش کی دیکھ بھال کے حصے کے طور پر، کیا درج ذیل میں سے کوئی بھی کم از کم ایک بار کیا گیا تھا | <b>Antenatal care</b>                                                                                                                                                                                    | <b>No (0)</b> | <b>Yes (1)</b> |
|                         |                                                                                                                                                                                                                                                 | a) Was your blood pressure measured?<br>کیا آپ کا بلڈ پریشر ماپا گیا تھا؟                                                                                                                                |               |                |
|                         |                                                                                                                                                                                                                                                 | b) Did you give a urine sample?<br>کیا آپ نے پیشاب کا نمونہ دیا؟                                                                                                                                         |               |                |
|                         |                                                                                                                                                                                                                                                 | c) Was your weight measured?<br>کیا آپ کا وزن ناپا گیا؟                                                                                                                                                  |               |                |
|                         |                                                                                                                                                                                                                                                 | d) Were you informed about importance of spacing next child?<br>کیا آپ کو اگلے بچے کے درمیان فاصلہ رکھنے کی اہمیت کے بارے میں آگاہ کیا گیا تھا؟                                                          |               |                |
|                         |                                                                                                                                                                                                                                                 | e) Was information provided for family planning methods available?<br>خاندانی منصوبہ بندی کے دستیاب طریقوں کے لیے معلومات فراہم کی گئیں؟                                                                 |               |                |
| 42.                     | Who decide the place of antenatal care visit?                                                                                                                                                                                                   | Husband.....1<br>Self.....2                                                                                                                                                                              |               |                |

|                                                          |                                                                                                                                                                      |                                                                                                                                                                                                                                                                                                                     |  |        |         |                                          |  |  |                                                          |  |  |                   |  |  |
|----------------------------------------------------------|----------------------------------------------------------------------------------------------------------------------------------------------------------------------|---------------------------------------------------------------------------------------------------------------------------------------------------------------------------------------------------------------------------------------------------------------------------------------------------------------------|--|--------|---------|------------------------------------------|--|--|----------------------------------------------------------|--|--|-------------------|--|--|
|                                                          | قبل از پیدائش کی دیکھ بھال کے دورے کی جگہ کا فیصلہ کون کرتا ہے؟                                                                                                      | Mother-in-law .....3                                                                                                                                                                                                                                                                                                |  |        |         |                                          |  |  |                                                          |  |  |                   |  |  |
| <b>Section 6: Delivery Status</b>                        |                                                                                                                                                                      |                                                                                                                                                                                                                                                                                                                     |  |        |         |                                          |  |  |                                                          |  |  |                   |  |  |
| 43.                                                      | Who assisted with the delivery of your last-born child<br>آپ کے آخری بچے کی پیدائش میں کس نے مدد کی؟                                                                 | Health professional doctor.....1<br>Nurse/midwife.....2<br>Lady health visitor.....3<br>Community mid wife.....4<br>Traditional birth attendant.....5<br>Relative / friend .....6<br>Other(mention).....7                                                                                                           |  |        |         |                                          |  |  |                                                          |  |  |                   |  |  |
| 44.                                                      | Place of last-born child<br>آپ کے آخری بچے کی پیدائش کی جگہ                                                                                                          | Home respondent's home..... 1<br>Other home .....2<br>Government hospital .....3<br>Community center.....4<br>Other public (specify)..... 5<br>Private hospital ..... 6<br>Private clinic ..... 7<br>Private maternity home..... 8<br>other (specify) .....                                                         |  |        |         |                                          |  |  |                                                          |  |  |                   |  |  |
| 45.                                                      | Baby delivered by which method of delivery?<br>بچے کی پیدائش کس طریقے سے ہوئی؟                                                                                       | Normal delivery .....1<br>C-section .....2                                                                                                                                                                                                                                                                          |  |        |         |                                          |  |  |                                                          |  |  |                   |  |  |
| <b>Section 7: Postnatal Care</b>                         |                                                                                                                                                                      |                                                                                                                                                                                                                                                                                                                     |  |        |         |                                          |  |  |                                                          |  |  |                   |  |  |
| 46.                                                      | After delivery did anyone check on your health?<br>کیا ڈیلیوری کے بعد کسی نے آپ کی صحت کی جانچ کی؟                                                                   | No .....0<br>Yes.....1                                                                                                                                                                                                                                                                                              |  |        |         |                                          |  |  |                                                          |  |  |                   |  |  |
| <b>If no, go to Q50</b>                                  |                                                                                                                                                                      |                                                                                                                                                                                                                                                                                                                     |  |        |         |                                          |  |  |                                                          |  |  |                   |  |  |
| 47.                                                      | Who checked on health at that time?<br>اُس وقت صحت کی جانچ کس نے کی؟                                                                                                 | Health professional doctor.....1<br>Nurse/midwife.....2<br>Lady health visitor.....3<br>Community mid wife.....4<br>Traditional birth attendant.....5<br>Relative/Friend.....6<br>Other(mention).....7                                                                                                              |  |        |         |                                          |  |  |                                                          |  |  |                   |  |  |
| 48.                                                      | Where did the check-up take place?<br>چیک آپ کہاں ہوا؟                                                                                                               | Home respondent's home ..... 1<br>Other home .....2<br>Government hospital .....3<br>Community center.....4<br>Other public (specify)..... 5<br>Private hospital ..... 6<br>Private clinic ..... 7<br>Private maternity home ..... 8<br>other (specify) .....                                                       |  |        |         |                                          |  |  |                                                          |  |  |                   |  |  |
| 49.                                                      | What health services did you receive when you visited the clinic after your delivery?<br>جب آپ اپنی ڈیلیوری کے بعد کلینک گئے تو آپ کو کونسی صحت کی خدمات حاصل ہوئیں؟ | <table border="1"> <tr> <td></td><td>N0 (0)</td><td>Yes (1)</td></tr> <tr> <td>a) Physical examination<br/>جسمانی امتحان</td><td></td><td></td></tr> <tr> <td>b) Counseling on breastfeeding<br/>دودھ پلانے میں رہنمائی</td><td></td><td></td></tr> <tr> <td>c) Contraceptives</td><td></td><td></td></tr> </table> |  | N0 (0) | Yes (1) | a) Physical examination<br>جسمانی امتحان |  |  | b) Counseling on breastfeeding<br>دودھ پلانے میں رہنمائی |  |  | c) Contraceptives |  |  |
|                                                          | N0 (0)                                                                                                                                                               | Yes (1)                                                                                                                                                                                                                                                                                                             |  |        |         |                                          |  |  |                                                          |  |  |                   |  |  |
| a) Physical examination<br>جسمانی امتحان                 |                                                                                                                                                                      |                                                                                                                                                                                                                                                                                                                     |  |        |         |                                          |  |  |                                                          |  |  |                   |  |  |
| b) Counseling on breastfeeding<br>دودھ پلانے میں رہنمائی |                                                                                                                                                                      |                                                                                                                                                                                                                                                                                                                     |  |        |         |                                          |  |  |                                                          |  |  |                   |  |  |
| c) Contraceptives                                        |                                                                                                                                                                      |                                                                                                                                                                                                                                                                                                                     |  |        |         |                                          |  |  |                                                          |  |  |                   |  |  |

|                                                                 |                                                                                                                                                                                                                      | مانع حمل ادویات<br>d) Blood test for anemia<br>خون کی کمی کے لیے خون کا ٹیسٹ<br>e) Nutritional supplements<br>غذائی سپلیمنٹس<br>f) Information on warning signs of problem<br>مسئلہ کی انتباہی علامات کے بارے میں معلومات<br>g) Other<br>کوئی اور                                   |          |        |         |                                                                 |  |  |                                         |  |  |  |  |
|-----------------------------------------------------------------|----------------------------------------------------------------------------------------------------------------------------------------------------------------------------------------------------------------------|-------------------------------------------------------------------------------------------------------------------------------------------------------------------------------------------------------------------------------------------------------------------------------------|----------|--------|---------|-----------------------------------------------------------------|--|--|-----------------------------------------|--|--|--|--|
| <b>Section 8: Family Planning and Unmet Needs</b>               |                                                                                                                                                                                                                      |                                                                                                                                                                                                                                                                                     |          |        |         |                                                                 |  |  |                                         |  |  |  |  |
| 50.                                                             | When you got pregnant last time/ this time (for currently pregnant), did you want to get pregnant at that time?<br>جب آپ پچھلی بار حاملہ ہوئیں/ اس بار (فی الحال حاملہ کے لیے)، کیا آپ اس وقت حاملہ ہونا چاہتی تھیں؟ | No.....0<br>Yes .....1                                                                                                                                                                                                                                                              |          |        |         |                                                                 |  |  |                                         |  |  |  |  |
| 51.                                                             | Would you like to have a child in future?<br>کیا آپ مستقبل میں بچہ پیدا کرنا چاہیں گی؟                                                                                                                               | No.....0<br>Yes .....1                                                                                                                                                                                                                                                              |          |        |         |                                                                 |  |  |                                         |  |  |  |  |
| 52.                                                             | Have you ever heard about any method of family planning?<br>کیا آپ نے کبھی خاندانی منصوبہ بندی کے کسی طریقے کے بارے میں سنا ہے؟                                                                                      | No.....0<br>Yes .....1                                                                                                                                                                                                                                                              |          |        |         |                                                                 |  |  |                                         |  |  |  |  |
| <b>If no, end the questionnaire</b>                             |                                                                                                                                                                                                                      |                                                                                                                                                                                                                                                                                     |          |        |         |                                                                 |  |  |                                         |  |  |  |  |
| 53.                                                             | Have you ever used anything to avoid or delay getting pregnant?<br>کیا آپ نے کبھی حاملہ ہونے سے بچنے یا تاخیر کرنے کے لیے کوئی چیز استعمال کی ہے؟                                                                    | No.....0<br>Yes .....1                                                                                                                                                                                                                                                              |          |        |         |                                                                 |  |  |                                         |  |  |  |  |
| <b>If no, go to Q59</b>                                         |                                                                                                                                                                                                                      |                                                                                                                                                                                                                                                                                     |          |        |         |                                                                 |  |  |                                         |  |  |  |  |
| 54.                                                             | Which methods you have ever used to avoid a pregnancy? (Mention as many as used)<br>حمل سے بچنے کے لیے آپ نے کون سے طریقے استعمال کیے ہیں؟ (جتنے طریقے استعمال کیے سب بتائیں)                                        |                                                                                                                                                                                                                                                                                     |          |        |         |                                                                 |  |  |                                         |  |  |  |  |
| 55.                                                             | Are you currently using anything to avoid or delay getting pregnant?<br>کیا آپ فی الحال حاملہ ہونے سے بچنے یا تاخیر کے لیے کچھ استعمال کر رہی ہیں؟                                                                   | No.....0<br>Yes .....1                                                                                                                                                                                                                                                              |          |        |         |                                                                 |  |  |                                         |  |  |  |  |
| <b>If no, go to Q59</b>                                         |                                                                                                                                                                                                                      |                                                                                                                                                                                                                                                                                     |          |        |         |                                                                 |  |  |                                         |  |  |  |  |
| 56.                                                             | What are you currently doing to delay or avoid a pregnancy?<br>آپ فی الحال حمل میں تاخیر یا اس سے بچنے کے لیے کیا کر رہی ہیں؟                                                                                        |                                                                                                                                                                                                                                                                                     |          |        |         |                                                                 |  |  |                                         |  |  |  |  |
| 57.                                                             | Where did you obtain (CURRENT METHOD) the last time?<br>آپ نے آخری بار (موجودہ طریقہ) کہاں سے حاصل کیا تھا؟                                                                                                          | <table border="1"> <tr> <th>Facility</th> <th>No (0)</th> <th>Yes (1)</th> </tr> <tr> <td>a) Family Health Clinic/RHSC<br/>فیملی ہیلتھ کلینک/آر ایچ ایس سی</td> <td></td> <td></td> </tr> <tr> <td>b) Government Hospital<br/>سرکاری ہسپتال</td> <td></td> <td></td> </tr> </table> | Facility | No (0) | Yes (1) | a) Family Health Clinic/RHSC<br>فیملی ہیلتھ کلینک/آر ایچ ایس سی |  |  | b) Government Hospital<br>سرکاری ہسپتال |  |  |  |  |
| Facility                                                        | No (0)                                                                                                                                                                                                               | Yes (1)                                                                                                                                                                                                                                                                             |          |        |         |                                                                 |  |  |                                         |  |  |  |  |
| a) Family Health Clinic/RHSC<br>فیملی ہیلتھ کلینک/آر ایچ ایس سی |                                                                                                                                                                                                                      |                                                                                                                                                                                                                                                                                     |          |        |         |                                                                 |  |  |                                         |  |  |  |  |
| b) Government Hospital<br>سرکاری ہسپتال                         |                                                                                                                                                                                                                      |                                                                                                                                                                                                                                                                                     |          |        |         |                                                                 |  |  |                                         |  |  |  |  |

|     |                                                                                                                                                    |                                                                                                                                                                                                                                                                                                                                                                                                                                                                                                                                                                                                                   |        |         |
|-----|----------------------------------------------------------------------------------------------------------------------------------------------------|-------------------------------------------------------------------------------------------------------------------------------------------------------------------------------------------------------------------------------------------------------------------------------------------------------------------------------------------------------------------------------------------------------------------------------------------------------------------------------------------------------------------------------------------------------------------------------------------------------------------|--------|---------|
|     |                                                                                                                                                    | c) Private/Ngo Hospital/Clinic<br>نجی/این جی او ہسپتال/کلینک                                                                                                                                                                                                                                                                                                                                                                                                                                                                                                                                                      |        |         |
|     |                                                                                                                                                    | d) Private Doctor<br>پرائیویٹ ڈاکٹر                                                                                                                                                                                                                                                                                                                                                                                                                                                                                                                                                                               |        |         |
|     |                                                                                                                                                    | e) LHW/ LHV<br>ایل ایچ ڈبلیو/ایل ایچ وی                                                                                                                                                                                                                                                                                                                                                                                                                                                                                                                                                                           |        |         |
|     |                                                                                                                                                    | f) MCH Center<br>ایم سی ایچ سینٹر                                                                                                                                                                                                                                                                                                                                                                                                                                                                                                                                                                                 |        |         |
|     |                                                                                                                                                    | g) BHU/ RHC<br>بی ایچ یو / آر ایچ سی                                                                                                                                                                                                                                                                                                                                                                                                                                                                                                                                                                              |        |         |
|     |                                                                                                                                                    | h) Pharmacy/Medical Store<br>فارمیسی/میڈیکل اسٹور                                                                                                                                                                                                                                                                                                                                                                                                                                                                                                                                                                 |        |         |
|     |                                                                                                                                                    | i) Dispenser/ Compounder<br>ڈسپنسر/کمپاؤنڈر                                                                                                                                                                                                                                                                                                                                                                                                                                                                                                                                                                       |        |         |
|     |                                                                                                                                                    | j) Shop(Not Pharmacy/Chemist)<br>دکان (فارمیسی/کیمسٹ نہیں)                                                                                                                                                                                                                                                                                                                                                                                                                                                                                                                                                        |        |         |
|     |                                                                                                                                                    | k) Friend/Relative<br>دوست/رشتہ دار                                                                                                                                                                                                                                                                                                                                                                                                                                                                                                                                                                               |        |         |
|     |                                                                                                                                                    | l) Dai, Traditional Birth Attendant<br>دائی، روایتی برتھ ایٹینڈنٹ                                                                                                                                                                                                                                                                                                                                                                                                                                                                                                                                                 |        |         |
|     |                                                                                                                                                    | m) Other, mention<br>کوئی اور ، ذکر کریں                                                                                                                                                                                                                                                                                                                                                                                                                                                                                                                                                                          |        |         |
| 58. | From how long, you are using a method to avoid or delay pregnancy?<br>کتنے عرصے سے، آپ حمل سے بچنے یا تاخیر کرنے کا طریقہ استعمال کر رہی ہیں؟      | _____ months                                                                                                                                                                                                                                                                                                                                                                                                                                                                                                                                                                                                      |        |         |
| 59. | What reasons have ever stopped you in the utilization of FP services?<br>کن وجوہات نے آپ کو خاندانی منصوبہ بندی سروسز کے استعمال میں کبھی روکا ہے؟ | <b>Barriers in service utilization</b><br>a) Not having the approval of husband/ family leader<br>شوہر/خاندانی سربراہ کی منظوری نہ ہونا<br>b) Believing that it is a sin to use a FP method<br>یہ ماننا کہ خاندانی منصوبہ بندی کے طریقے کا استعمال گناہ ہے<br>c) Believing that it could cause abnormal bleeding<br>یہ یقین کرنا کہ یہ غیر معمولی خون بہنے کا سبب بن سکتا ہے۔<br>d) Believing that it could cause infertility<br>یہ ماننا کہ یہ بانجھ پن کا سبب بن سکتا ہے۔<br>e) Believing that it could cause cancer<br>یہ ماننا کہ یہ کینسر کا سبب بن سکتا ہے۔<br>f) Believing that it could cause pelvic pain | No (0) | Yes (1) |



|                         |                                                                                                                                                                                              |                                                                                                                                                                                                                                                                                                                                                                                    |        |         |
|-------------------------|----------------------------------------------------------------------------------------------------------------------------------------------------------------------------------------------|------------------------------------------------------------------------------------------------------------------------------------------------------------------------------------------------------------------------------------------------------------------------------------------------------------------------------------------------------------------------------------|--------|---------|
|                         |                                                                                                                                                                                              | یہ ماننا کہ یہ شرونیی درد کا سبب بن سکتا ہے۔                                                                                                                                                                                                                                                                                                                                       |        |         |
|                         |                                                                                                                                                                                              | g) Other, mention<br>کوئی اور ، ذکر کریں                                                                                                                                                                                                                                                                                                                                           |        |         |
| 60.                     | Have you ever faced any problem/barrier in getting services of Family planning?<br>کیا آپ کو خاندانی منصوبہ بندی کی خدمات حاصل کرنے میں کبھی کسی پریشانی/ رکاوٹ کا سامنا کرنا پڑا ہے؟        | No.....0<br>Yes .....1                                                                                                                                                                                                                                                                                                                                                             |        |         |
| <b>If no, go to Q62</b> |                                                                                                                                                                                              |                                                                                                                                                                                                                                                                                                                                                                                    |        |         |
| 61.                     | What problems/ barriers you face while accessing the services of FP?<br>خاندانی منصوبہ بندی کی خدمات تک رسائی کے دوران آپ کو کن مسائل کا سامنا کرنا پڑتا ہے۔                                 | <b>Barriers in Healthcare Accessibility</b><br>a) Distance to healthcare facility<br>ہیلتھ کیئر کی سہولت کا فاصلہ<br>b) Lack of transportation<br>ذرائع آمد و رفت کی کمی<br>c) Unavailability of FP service at healthcare facility/ LHW/ LHV<br>خاندانی منصوبہ بندی، ہیلتھ کیئر، ایل ایچ ڈبلیو/ ایل ایچ وی جیسی سہولیات کی عدم دستیابی<br>d) Other, mention<br>کوئی اور ، ذکر کریں | No (0) | Yes (1) |
| 62.                     | Who usually makes the decision on whether or not you should use contraception?<br>عام طور پر کون فیصلہ کرتا ہے کہ آپ کو حمل کو روکنے والی چیزوں کا استعمال کرنا چاہیے یا نہیں؟               | Respondent.....1<br>Respondent's husband .....2<br>Jointly.....3<br>Mother in law.....4<br>Other Family members.....5<br>Other, mention.....6                                                                                                                                                                                                                                      |        |         |
| 63.                     | Were you ever told by anyone about the methods of family planning that you could use?<br>کیا آپ کو کبھی کسی نے خاندانی منصوبہ بندی کے طریقوں کے بارے میں بتایا ہے جو آپ استعمال کر سکتے ہیں؟ | No.....0<br>Yes .....1                                                                                                                                                                                                                                                                                                                                                             |        |         |
| 64.                     | Who talked to you about the methods of family planning that you could use?<br>کس نے آپ سے خاندانی منصوبہ بندی کے طریقوں کے بارے میں بات کی جو آپ استعمال کر سکتے ہیں؟                        | a) Doctor<br>ڈاکٹر<br>b) Nurse<br>نرس<br>c) LHW<br>ایل ایچ ڈبلیو<br>d) Family Planning worker<br>خاندانی منصوبہ بندی کارکن<br>e) Other staff at health facility<br>صحت کی سہولت میں دیگر عملے نے<br>f) Other, mention<br>کوئی اور ، ذکر کریں                                                                                                                                       | No (0) | Yes (1) |

[illegible]

[illegible]

| Breastfeeding<br>Exclusive for 6<br>months<br>Inclusive |  |  |  |  |  |  |  |  |
|---------------------------------------------------------|--|--|--|--|--|--|--|--|
|                                                         |  |  |  |  |  |  |  |  |
